# Supplementary material
Source: MDPI journal article supplement (https://www.mdpi.com/2073-4395/11/5/881)
Supplement: s1 [file s1]

# Supplementary Materials

Table S1 1. Number of farmers allocating fresh paddy produced to different use\*

| Purpose             | Dry 2017 (n=44) |      | Wet 2017/18 (n=145) |      | Wet 2018 (n=133) |      |
|---------------------|-----------------|------|---------------------|------|------------------|------|
|                     | n               | %    | n                   | %    | n                | %    |
| Home consumption    | 29              | 65.9 | 120                 | 82.8 | 116              | 87.2 |
| Sold as fresh paddy | 15              | 34.1 | 30                  | 20.7 | 20               | 15.0 |
| Storage and drying  | 9               | 20.5 | 45                  | 31.0 | 46               | 34.6 |

\*multiple responses

Table S1 2 Variables of change with items used to measure the latent construct

| Variables of change     | items                                                                                               | Mean | SD    |
|-------------------------|-----------------------------------------------------------------------------------------------------|------|-------|
| Financial capital       | I have been able to provide financial support to others                                             | 2.72 | 1.364 |
|                         | I have been able to take out a loan                                                                 | 2.06 | 1.114 |
|                         | I have been able to save money due to increase in income                                            | 2.71 | 1.409 |
| Employment              | I was able to take on other paid work                                                               | 3.06 | 1.514 |
|                         | my wife/husband was able to take on other paid work                                                 | 2.73 | 1.429 |
|                         | I was able to employ more farm workers.                                                             | 2.30 | 1.236 |
| Agricultural Production | My yield has increased a lot                                                                        | 3.99 | 1.259 |
|                         | I have produced higher quality rice                                                                 | 4.43 | 1.005 |
|                         | rice farming has become more difficult                                                              | 2.11 | .964  |
|                         | working on the farm is not as hard anymore                                                          | 4.01 | 1.144 |
|                         | I have been able to save money due to avoided production costs                                      | 2.77 | 1.206 |
|                         | I spent more money on production costs                                                              | 2.09 | .876  |
| Physical capital        | I have been able to buy new farming equipment                                                       | 2.31 | 1.379 |
|                         | I have been able to upgrade or build new farm buildings (e.g. tractor shed)                         | 2.08 | 1.235 |
|                         | I have been able to buy more land for rice production                                               | 1.76 | .951  |
|                         | I was able to have my house, or a part of my house, renovated (e.g. roofing, floors, windows, etc.) | 2.16 | 1.348 |
|                         | I have been able to build a new house                                                               | 1.78 | 1.015 |
| Poverty                 | My family has more money to spend                                                                   | 2.80 | 1.214 |
|                         | I have more money than before                                                                       | 2.92 | 1.265 |
|                         | I have lost a lot of money                                                                          | 1.75 | .654  |
| Land tenure             | I have been able to expand my rice production through renting other land                            | 2.01 | 1.164 |
|                         | I had to sell some of my land                                                                       | 1.45 | .549  |
|                         | I have been able to buy more land for farming other crops, vegetables or fruit                      | 1.68 | .886  |
|                         | I have been able to buy land for building a house (or the land the rented where their house is on)  | 1.67 | .918  |
| Social Capital          | I can now provide advice to fellow farmers on how to improve their farming practices                | 4.27 | 1.070 |
|                         | I can now organize farmers into groups to work together to improve farming practices                | 3.94 | 1.319 |
|                         | I can now communicate with other farmers about my experience in using best management practices     | 4.28 | .956  |
| Human Capital           | I have gained a lot of knowledge                                                                    | 4.54 | .903  |
|                         | I have been able to provide better workforce                                                        | 3.12 | 1.344 |
|                         | I have changed my farming habits                                                                    | 3.93 | 1.252 |
|                         | I am now able to express concerns about my farming practices                                        | 4.05 | 1.087 |
| Natural Capital         | I see more good insects in my field                                                                 | 2.61 | 1.278 |
|                         | I have seen more birds around my fields                                                             | 2.75 | 1.345 |
|                         | I have seen less frogs and toads in my fields                                                       | 2.74 | 1.385 |

|                  |                                                                          |      |       |
|------------------|--------------------------------------------------------------------------|------|-------|
|                  | there are more fish in my fields                                         | 1.73 | .716  |
| Food Security    | My family can eat one more meal than before                              | 2.86 | 1.176 |
|                  | My family's eating habits have not changed at all.                       | 3.15 | 1.332 |
|                  | My family can eat more special food products                             | 2.80 | 1.161 |
|                  | My family can eat more meat                                              | 2.65 | 1.109 |
|                  | My family can eat more fruits                                            | 2.99 | 1.161 |
|                  | My family can eat more vegetables                                        | 3.28 | 1.155 |
|                  | The portion sizes of our meals have increased                            | 2.41 | .949  |
|                  | My family eats more kinds of food                                        | 3.08 | 1.282 |
| Cultural capital | I can buy fashionable clothes for my children.                           | 2.57 | 1.481 |
|                  | I was able to buy a mobile phone                                         | 2.10 | 1.286 |
|                  | I was able to buy new furniture for the family home.                     | 2.03 | 1.219 |
|                  | I can now provide more donations/pledges for community activities        | 3.82 | 1.283 |
|                  | I was able to participate in community activities                        | 3.77 | 1.360 |
|                  | I was able to participate in religious pilgrimages                       | 2.14 | 1.475 |
| Health           | I can immediately seek healthcare without waiting for government support | 3.01 | 1.487 |
|                  | My health has improved a lot                                             | 3.08 | 1.280 |
|                  | I have more health issues                                                | 1.92 | .952  |

Note. Items were measured on a six point likert-type scale (1 = completely disagree, 6 = fully agree)
